# Supplementary material for: Dynamic neuromuscular remodeling precedes motor-unit loss in a mouse model of ALS
Source: eLife journal article supplement (doi:10.7554/elife.41973), 2018-10-15
Supplement: supp [file Figure1_Source.data.xlsx]

## Sheet: WTs
Counting unknowns																Counting unknowns											Counting unknowns											Counting unknowns											Counting unknowns
CVV #5																CVV #6											CVV#15											CVV#23											CVV#25
Sessions	1	2	3	4	5	6										Sessions	1	2	3	4	5						Sessions	1	2	3	4	5						Sessions	1	2	3	4	5	6					Sessions
A1	1	x	1	1	1											A1	1	x	1	1	1						A1	1	1	1	1	1						A1	1	1	1	1	1	1					A1
A2	1	1	1	1	x											A2	x	x	1	1	1						A2	1	1	1	1	1						A2	1	1	1	1	1	1					A2
A3	1	1	1	1	1											A3	x	x	1	1	1						A3	1	1	1	1	1						A3	1	1	1	1	1	1					A3
A4	1	1	1	1	1											A4	x	x	1	1	1						A4	1	1	1	1	1						A4	1	1	1	1	1	1					A4
A5	1	x	1	1	x																						A5	1	1	1	1	1						A5	discard										A5
A6	1	1	1	1	1																						A6	1	1	1	1	1																	A6
A6'	x	1	1	1	1																						A7	1	1	1	1	1																	A7
A7	1	1	1	1	1																																												A8
A8	1	1	1	1	1																																												A9
																																																	A10
																																																	A11
																																																	A12
MU size	9	9	9	9	9											MU size	4	4	4	4	4						MU size	0.07	0.07	0.07	0.07	0.07						MU size	0.04	0.04	0.04	0.04	0.04	0.04					MU size
9	% of innervated NMJs	% of innervated NMJs	% of innervated NMJs	% of innervated NMJs	% of innervated NMJs	% of innervated NMJs	% of innervated NMJs	% of innervated NMJs								4	% of innervated NMJs	% of innervated NMJs	% of innervated NMJs	% of innervated NMJs	% of innervated NMJs	% of innervated NMJs	% of innervated NMJs	% of innervated NMJs			7	% of innervated NMJs	% of innervated NMJs	% of innervated NMJs	% of innervated NMJs	% of innervated NMJs	% of innervated NMJs	% of innervated NMJs	% of innervated NMJs	% of innervated NMJs		4	% of innervated NMJs	% of innervated NMJs	% of innervated NMJs	% of innervated NMJs	% of innervated NMJs	% of innervated NMJs	% of innervated NMJs	% of innervated NMJs	% of innervated NMJs		12
	0.888889	0.777778	1	1	0.777778												0.25	0	1	1	1							1	1	1	1	1							1	1	1	1	1	1
	% of unknowns	% of unknowns	% of unknowns	% of unknowns	% of unknowns	% of unknowns	% of unknowns	% of unknowns									% of unknowns	% of unknowns	% of unknowns	% of unknowns	% of unknowns	% of unknowns	% of unknowns	% of unknowns				% of unknowns	% of unknowns	% of unknowns	% of unknowns	% of unknowns	% of unknowns	% of unknowns	% of unknowns	% of unknowns			% of unknowns	% of unknowns	% of unknowns	% of unknowns	% of unknowns	% of unknowns	% of unknowns	% of unknowns	% of unknowns
intial	0.111111	0.222222	0	0	0.222222											intial	0.75	1	0	0	0						intial	0	0	0	0	0						intial	0	0	0	0	0	0					intial
	Legend:
	Compilation
		Sessions	1	2	3	4	5	6
	Innervated	CVV #5	0.888889	0.777778	1	1	0.777778
		CVV #6	0.25	0	1	1	1
		CVV#15	1	1	1	1	1
		CVV#23	1	1	1	1	1	1
		CVV#25	1	0.916667	0.833333	0.833333	0	0
	Unknown	CVV #5	0.111111	0.222222	0	0	0.222222
		CVV #6	0.75	1	0	0	0
		CVV#15	0	0	0	0	0
		CVV#23	0	0	0	0	0	0
		CVV#25	0	0.0833333	0.166667	0.166667	1	1
[truncated: 9 more columns]
