# Supplementary material for: Dynamic neuromuscular remodeling precedes motor-unit loss in a mouse model of ALS
Source: eLife journal article supplement (doi:10.7554/elife.41973), 2018-10-15
Supplement: supp [file Figure2.supp1_Source.data1.xlsx]

## Sheet: Raw.values
	Panel B	Body weight
	Bin		Center of bin	SOD1-YFP-h												SOD1-G37R
	292-298		295	30	45	38	33	31	33	34	37	33	29	47	35	29	36	33	40
	299-305		302	29	46	39	34	32	34	34	40	34	31	44	30	30	35	32	39		Full statistical test results are present in another tab for Figure 2 - Supplement 1B and 1C as they could not be fully incorporated in the legend
	306-312		309	28	46	40	34	32	34	34	36	34	29	42	32	30	36	33	41
	313-319		316	29	48	41	34	32	33	36	40	35	28	44	30	30	35	31	41		For figure 2 - Supplement 1, Panel E to I : the results are included in the legend of the figure
	320-326		323	30	46	42	33	32	33	35	36	33	28	39	33	31	36	31	40
	327-333		330	29	46	38	33	32	34	35	38	33	30	39	33	30	35	31	39
	334-340		337	29	45	40	32	32	35	36	36	33	28	39	34	31	35	31	39
	341-347		344	28	47	39	31	32	34	36	37	32	28	40	34	30	35	30	40
	348-354		351	29	48	42	31	32	34	32	34	31	28	40	34	30	34	31	38
	355-361		358	30	49	42	31	32	34	31	36	31	29	38	31	29	33	30	38
	Panel C	All limb grip strength
	Bin		Center of bin	SOD1-YFP-h												SOD1-G37R
	292-298		295	260	204	225	224	263	201	292	237	252	255	183	234	237	231	235	239
	299-305		302	219	190	172	244	253	189	230	244	201	225	222	234	256	231	248	256
	306-312		309	193	267	241	230	256	230	266	232	248	254	219	234	213	263	261	274
	313-319		316	156	250	204	234	246	277	302	276	228	197	305	206	204	228	220	275
	320-326		323	198	271	206	241	217	274	217	255	298	235	223	211	219	219	224	282
	327-333		330	217	205	237	233	183	251	228	242	202	309	232	264	197	248	195	218
	334-340		337	189	273	225	208	236	206	224	220	196	242	268	244	221	226	203	225
	341-347		344	171	246	201	257	223	205	227	245	218	216	224	251	214	237	154	204
	348-354		351	167	254	278	199	196	233	197	285	240	233	229	246	239	199	193	177
	355-361		358	162	202	225	187	166	189	209	228	166	225	222	208	201	199	147	123
	Panel E and F		α- and γ-motorneuron counts				Panel H	% of YFP expressing MNs			Panel I	NMJ innervation
		Genotype	α-MNs	γ-MNs				Genotype	% of YFP MNs			Genotype	# of Completely den	# of Partially den	# of fully innervated	# of Den	# of NMJs	Total # of NMJs
		SOD1-YFP	12.8788	6.30303				WT-YFP	0.048			SOD1-YFP	3	9	109	12	121
		SOD1-YFP	2.89286	5.92857				WT-YFP	0.048062			SOD1-YFP	131	45	16	176	192
		SOD1-YFP	14	6.39474				WT-YFP	0.0863095			SOD1-YFP	18	50	75	68	143
		SOD1-YFP	7.52381	5.04762				WT-YFP	0.0743802			SOD1-YFP	149	30	25	179	204
		SOD1-YFP	8.85	6.325				WT-YFP	0.0294985			SOD1-YFP	83	57	20	140	160	820
		SOD1-G37R	7.25806	7.12903				WT-YFP	0.0765864			SOD1	203	29	35	232	267
		SOD1-G37R	8.5	5.16667				SOD1-YFP	0.0348101			SOD1	165	49	37	214	251
		SOD1-G37R	6.25	6.0625				SOD1-YFP	0.037037			SOD1	179	75	67	254	321
		SOD1-G37R	6.63158	5.26316				SOD1-YFP	0.0338346			SOD1	156	66	56	222	278	1117
								SOD1-YFP	0.0541176
								SOD1-YFP	0.0254237
								SOD1-YFP	0.0363636
								SOD1-YFP	0.047619
								SOD1-YFP	0.0582524
								SOD1-YFP	0.0521739

## Sheet: Statistical.test.results
	Panel B						Panel C
	Full.Data- Weight - SOD1-YFP-H vs SOD1-G37R						Full.Data- Grip - SOD1-YFP-H vs SOD1-G37R
	2-way anova with repeated measures						2-way anova with repeated measures
	Source of Variation	% of total variation	P value	P value summary	Significant?		Source of Variation	% of total variation	P value	P value summary	Significant?
	Interaction	0.2158	0.8874	ns	No		Interaction	5.846	0.2189	ns	No
	Time	0.7204	0.1237	ns	No		Time	20.78	<0.0001	****	Yes
	Genotype	0.9725	0.7059	ns	No		Genotype	1.048	0.3186	ns	No
	Subjects (matching)	91.75	<0.0001	****	Yes		Subjects (matching)	13.72	0.02	*	Yes
	Holm-Sidak's multiple comparisons test	Mean Diff.	Significant?	Summary	Adjusted P Value		Holm-Sidak's multiple comparisons test	Mean Diff.	Significant?	Summary	Adjusted P Value
	295	-0.9167	No	ns	0.9997		295	-0.3333	No	ns	0.997
	302	-1.583	No	ns	0.9997		302	29.17	No	ns	0.5702
	309	-0.08333	No	ns	0.9997		309	13.58	No	ns	0.9384
	316	-1.583	No	ns	0.9997		316	-8.333	No	ns	0.9758
	323	-0.5	No	ns	0.9997		323	-1.167	No	ns	0.997
	330	-1.25	No	ns	0.9997		330	-19.08	No	ns	0.8426
	337	-0.9167	No	ns	0.9997		337	-8.833	No	ns	0.9758
	344	-1.083	No	ns	0.9997		344	-21.42	No	ns	0.8104
	351	-1.333	No	ns	0.9997		351	-27.75	No	ns	0.5922
	358	-2	No	ns	0.9992		358	-31.58	No	ns	0.4961
