# Supplementary material for: Dynamic neuromuscular remodeling precedes motor-unit loss in a mouse model of ALS
Source: eLife journal article supplement (doi:10.7554/elife.41973), 2018-10-15
Supplement: supp [file Figure4_Source1.data.xlsx]

## Sheet: Females
Including unknowns
CVV 32 Branch A											CVV 32 Branch B											CVV 34 Branch A										CVV 34 Branch B										CVV 34 Branch C
Sessions	1	2	3	4	5	6					Sessions	1	2	3	4	5	6					Sessions	1	2	3	4	5	6	0	0		Sessions	1	2	3	4	5	6	0	0		Sessions	1	2	3	4	5	6
A1	1	1	x	1	1	0					B1	Branch found on session 3		1	1	1	0					B1/A1	0	0	0	0	1	1				B1/A1	1	1	1	1	0	0				C2	1	1	1	1	1	1
A2	1	1	x	1	1	0					B2			1	1	1	0					B2/A2	0	0	0	0.5	0	0				B2/A2	1	1	1	0.5	0	0				C3	1	1	1	1	1	1
A3	1	1	x	1	x	0					B3			1	1	1	0					A3	1	1	1	1	1	1				B4	1	1	1	0.5	0	0				C4	1	1	1	1	1	0.5
A4	1	1	x	1	x	0					B2'			0	0	1	0					B4/A4	0	0	0	0.5	1	1				B8	1	1	1	1	0	x				C6	0.5	0	1	1	1	1
A5	1	1	x	0.5	0.5	0					B3'			0	0	1	0					A5	1	1	1	1	1	1				B9	1	1	1	1	0	0				C7	1	1	1	1	1	1
																						A6	1	1	1	1	1	1				B7/A7	0.5	0	0	x	0	x				C14	x	1	1	1	1	1
																						A5'	0	0	0	0.5	1	1				B10	1	1	1	1	0	0				C15	x	1	1	1	1	1
																						A5''	0	0	0	1	1	1				B11	1	1	1	1	0	0				C16	1	1	1	1	0.5	1
																						A5'''	0	0	0	0.5	1	1				B9'	0	0	0	0.5	0	0				C19	1	1	1	1	1	1
																						B9/A9	0	0	0	0	1	1														C20	1	1	1	1	1	1
																						B7/A7	0	0	0	x	1	x														C21	x	0.5	x	1	1	1
																						B10/A10	0	0	0	0	0	1														C24	1	1	1	1	1	1
																						B11/A11	0	0	0	0	0.5	1														D5	0	0	1	1	1	0.5
																																										C6'	0	0	x	1	1	1
																																										D1''	0	0	0	0	0.5	0.5
																																										D11	0	0	0	0	1	1
																																										D12	0	0	0	0	1	1
																																										C16'		0	0	1	x	1
																																										D18	0	0	0	0	1	1
																																										C20'	0	0	0	0.5	1	1
																																										C20''	0	0	0	0	0.5	1
																																										D23		0		0	1	1
																																										D23'		0		0	0.5	1
																																										C19'	0	0	0	0.5	0	0
																																										C19''	0	0	0	0	0	1
																																										C25	0	0	0	0	1	1
																																										C25'	0	0	0	0	1	1
																																										C25''	0	0	0	0	1	1
																																										C28	0	0	0	0	0	1
																																										C28'	0	0	0	0	0	1
																																										C26	0	0	0	0	1	1
																																										C26'	0	0	0	0	1	1
MU Size	5	5	5	5	5						MU Size			3	3	5	0					MU Size	3	3	3	9	11	12				MU Size	8	7	7	8	0	0				MU Size	12	11	14	17	28	31
Delta		1 to 2	2 to 3	3 to 4	4 to 5	5 to 6					Delta		1 to 2	2 to 3	3 to 4	4 to 5	5 to 6					Delta		1 to 2	2 to 3	3 to 4	4 to 5	5 to 6				Delta		1 to 2	2 to 3	3 to 4	4 to 5	5 to 6				Delta		1 to 2	2 to 3	3 to 4	4 to 5	5 to 6
A1		0	x	0	0	-1					B1				0	0	-1					B1/A1		0	0	0	1	0				B1/A1		0	0	0	-1	0				C2		0	0	0	0	0
A2		0	x	0	0	-1					B2				0	0	-1					B2/A2		0	0	0.5	-0.5	0				B2/A2		0	0	-0.5	-0.5	0				C3		0	0	0	0	0
A3		0	x	0	0	-1					B3				0	0	-1					A3		0	0	0	0	0				B4		0	0	-0.5	-0.5	0				C4		0	0	0	0	-0.5
A4		0	x	0	0	-1					B2'				0	1	-1					B4/A4		0	0	0.5	0.5	0				B8		0	0	0	-1	x				C6		-0.5	1	0	0	0
A5		0	x	0	0	-0.5					B3'				0	1	-1					A5		0	0	0	0	0				B9		0	0	0	-1	0				C7		0	0	0	0	0
																						A6		0	0	0	0	0				B7/A7		-0.5	0	x	0	x				C14		0	0	0	0	0
																						A5'		0	0	0.5	0.5	0				B10		0	0	0	-1	0				C15		0	0	0	0	0
																						A5''		0	0	1	0	0				B11		0	0	0	-1	0				C16		0	0	0	-0.5	0.5
																						A5'''		0	0	0.5	0.5	0				B9'		0	0	0.5	-0.5	0				C19		0	0	0	0	0
																						B9/A9		0	0	0	1	0														C20		0	0	0	0	0
																						B7/A7		0	0	x	1	x														C21		0	x	0.5	0	0
																						B10/A10		0	0	0	0	1														C24		0	0	0	0	0
																						B11/A11		0	0	0	0.5	0.5														D5		0	1	0	0	-0.5
																																										C6'		0	x	1	0	0
																																										D1''		0	0	0	0.5	0
																																										D11		0	0	0	1	0
																																										D12		0	0	0	1	0
																																										C16'		0	0	1	x	0
																																										D18		0	0	0	1	0
																																										C20'		0	0	0.5	0.5	0
																																										C20''		0	0	0	0.5	0.5
																																										D23		0		0	1	0
																																										D23'		0		0	0.5	0.5
																																										C19'		0	0	0.5	-0.5	0
																																										C19''		0	0	0	0	1
																																										C25		0	0	0	1	0
																																										C25'		0	0	0	1	0
																																										C25''		0	0	0	1	0
																																										C28		0	0	0	0	1
																																										C28'		0	0	0	0	1
																																										C26		0	0	0	1	0
																																										C26'		0	0	0	1	0
Reinn/Repaired/New?		1 to 2	2 to 3	3 to 4	4 to 5	5 to 6					Reinn/Repaired/New?		1 to 2	2 to 3	3 to 4	4 to 5	5 to 6					Reinn/Repaired/New?		2 to 3	3 to 4	4 to 5	5 to 6	6 to 7				Reinn/Repaired/New?		1 to 2	2 to 3	3 to 4	4 to 5	5 to 6				Reinn/Repaired/New?		1 to 2	2 to 3	3 to 4	4 to 5	5 to 6
A1		No	x	No	No	No					B1				No	No	No					B1/A1		No	No	No	New	New				B1/A1		No	No	No	No	No				C2		No	No	No	No	No
A2		No	x	No	No	No					B2				No	No	No					B2/A2		No	No	New	New	New				B2/A2		No	No	No	No	No				C3		No	No	No	No	No
A3		No	x	No	No	No					B3				No	No	No					A3		No	No	No	No	No				B4		No	No	No	No	No				C4		No	No	No	No	No
A4		No	x	No	No	No					B2'				No	New	New					B4/A4		No	No	New	New	New			Reinnervated = denervated then reinnervated	B8		No	No	No	No	No				C6		No	Reinnervated	Reinnervated	Reinnervated	Reinnervated
A5		No	x	No	No	No					B3'				No	New	New					A5		No	No	No	No	No			Repaired = partial then innervated	B9		No	No	No	No	No				C7		No	No	No	No	No
																						A6		No	No	No	No	No			New = not initially in MU	B7/A7		No	No	No	No	No				C14		No	No	No	No	No
																						A5'		No	No	New	New	New				B10		No	No	No	No	No				C15		No	No	No	No	No
																						A5''		No	No	New	New	New				B11		No	No	No	No	No				C16		No	No	No	No	Repaired
																						A5'''		No	No	New	New	New				B9'		No	No	New	New	New				C19		No	No	No	No	No
																						B9/A9		No	No	No	New	New														C20		No	No	No	No	No
																						B7/A7		No	No	x	New	x														C21		No	x	Repaired	Repaired	Repaired
																						B10/A10		No	No	No	No	New														C24		No	No	No	No	No
																						B11/A11		No	No	No	New	New														D5		No	New	New	New	New
																																										C6'		No	x	New	New	New
																																										D1''		No	No	No	New	New
																																										D11		No	No	No	New	New
																																										D12		No	No	No	New	New
																																										C16'		No	No	New	x	New
																																										D18		No	No	No	New	New
																																										C20'		No	No	New	New	New
																																										C20''		No	No	No	New	New
																																										D23		No		No	New	New
																																										D23'		No		No	New	New
																																										C19'		No	No	New	New	New
																																										C19''		No	No	No	No	New
																																										C25		No	No	No	New	New
																																										C25'		No	No	No	New	New
																																										C25''		No	No	No	New	New
																																										C28		No	No	No	No	New
																																										C28'		No	No	No	No	New
																																										C26		No	No	No	New	New
																																										C26'		No	No	No	New	New
# of initial NMJs	% of innervated NMJs	% of innervated NMJs	% of innervated NMJs	% of innervated NMJs	% of innervated NMJs	% of innervated NMJs	% of innervated NMJs	% of innervated NMJs			# of initial NMJs			% of innervated NMJs	% of innervated NMJs	% of innervated NMJs	% of innervated NMJs					# of initial NMJs	% of innervated NMJs	% of innervated NMJs	% of innervated NMJs	% of innervated NMJs	% of innervated NMJs	% of innervated NMJs	% of innervated NMJs	% of innervated NMJs		# of initial NMJs	% of innervated NMJs	% of innervated NMJs	% of innervated NMJs	% of innervated NMJs	% of innervated NMJs	% of innervated NMJs	% of innervated NMJs	% of innervated NMJs		# of initial NMJs	% of innervated NMJs	% of innervated NMJs	% of innervated NMJs	% of innervated NMJs	% of innervated NMJs	% of innervated NMJs	% of innervated NMJs
5	1	1	0	0.8	0.4	0					3			1	1	1	0					3	1	1	1	1	1	1				8	0.875	0.875	0.875	0.625	0	0				12	0.666667	0.833333	0.833333	0.833333	0.75	0.666667
	% of partial	% of partial	% of partial	% of partial	% of partial	% of partial	% of partial	% of partial						% of partial	% of partial	% of partial	% of partial						% of partial	% of partial	% of partial	% of partial	% of partial	% of partial	% of partial	% of partial			% of partial	% of partial	% of partial	% of partial	% of partial	% of partial	% of partial	% of partial			% of partial	% of partial	% of partial	% of partial	% of partial	% of partial	% of partial
	0	0	0	0.2	0.2	0								0	0	0	0						0	0	0	0	0	0					0.125	0	0	0.25	0	0					0.0833333	0.0833333	0	0	0.0833333	0.0833333
	% of in + par	% of in + par	% of in + par	% of in + par	% of in + par	% of in + par	% of in + par	% of in + par						% of in + par	% of in + par	% of in + par	% of in + par						% of in + par	% of in + par	% of in + par	% of in + par	% of in + par	% of in + par	% of in + par	% of in + par			% of in + par	% of in + par	% of in + par	% of in + par	% of in + par	% of in + par	% of in + par	% of in + par			% of in + par	% of in + par	% of in + par	% of in + par	% of in + par	% of in + par	% of in + par
	1	1	0	1	0.6	0								1	1	1	0						1	1	1	1	1	1					1	0.875	0.875	0.875	0	0					0.75	0.916667	0.833333	0.833333	0.833333	0.75
	% of repaired	% of repaired	% of repaired	% of repaired	% of repaired	% of repaired	% of repaired	% of repaired						% of repaired	% of repaired	% of repaired	% of repaired						% of repaired	% of repaired	% of repaired	% of repaired	% of repaired	% of repaired	% of repaired	% of repaired			% of repaired	% of repaired	% of repaired	% of repaired	% of repaired	% of repaired	% of repaired	% of repaired			% of repaired	% of repaired	% of repaired	% of repaired	% of repaired	% of repaired	% of repaired
		0	0	0	0	0									0	0	0							0	0	0	0	0						0	0	0	0	0						0	0	0.0833333	0.0833333	0.166667
	% of partially reinnervated	% of partially reinnervated	% of partially reinnervated	% of partially reinnervated	% of partially reinnervated	% of partially reinnervated	% of partially reinnervated	% of partially reinnervated						% of partially reinnervated	% of partially reinnervated	% of partially reinnervated	% of partially reinnervated						% of partially reinnervated	% of partially reinnervated	% of partially reinnervated	% of partially reinnervated	% of partially reinnervated	% of partially reinnervated	% of partially reinnervated	% of partially reinnervated			% of partially reinnervated	% of partially reinnervated	% of partially reinnervated	% of partially reinnervated	% of partially reinnervated	% of partially reinnervated	% of partially reinnervated	% of partially reinnervated			% of partially reinnervated	% of partially reinnervated	% of partially reinnervated	% of partially reinnervated	% of partially reinnervated	% of partially reinnervated	% of partially reinnervated
		0	0	0	0	0									0	0	0							0	0	0	0	0						0	0	0	0	0						0	0	0	0	0
	% of reinnervated	% of reinnervated	% of reinnervated	% of reinnervated	% of reinnervated	% of reinnervated	% of reinnervated	% of reinnervated						% of reinnervated	% of reinnervated	% of reinnervated	% of reinnervated						% of reinnervated	% of reinnervated	% of reinnervated	% of reinnervated	% of reinnervated	% of reinnervated	% of reinnervated	% of reinnervated			% of reinnervated	% of reinnervated	% of reinnervated	% of reinnervated	% of reinnervated	% of reinnervated	% of reinnervated	% of reinnervated			% of reinnervated	% of reinnervated	% of reinnervated	% of reinnervated	% of reinnervated	% of reinnervated	% of reinnervated
		0	0	0	0	0									0	0	0							0	0	0	0	0						0	0	0	0	0						0	0.0833333	0.0833333	0.0833333	0.0833333
	% of total reinnervated	% of total reinnervated	% of total reinnervated	% of total reinnervated	% of total reinnervated	% of total reinnervated	% of total reinnervated	% of total reinnervated						% of total reinnervated	% of total reinnervated	% of total reinnervated	% of total reinnervated						% of total reinnervated	% of total reinnervated	% of total reinnervated	% of total reinnervated	% of total reinnervated	% of total reinnervated	% of total reinnervated	% of total reinnervated			% of total reinnervated	% of total reinnervated	% of total reinnervated	% of total reinnervated	% of total reinnervated	% of total reinnervated	% of total reinnervated	% of total reinnervated			% of total reinnervated	% of total reinnervated	% of total reinnervated	% of total reinnervated	% of total reinnervated	% of total reinnervated	% of total reinnervated
		0	0	0	0	0									0	0	0							0	0	0	0	0						0	0	0	0	0						0	0	0	0	0
Total repaired/rein		0	0	0	0	0					Total repaired/rein				0	0	0					Total repaired/rein		0	0	0	0	0				Total repaired/rein		0	0	0	0	0				Total repaired/rein		0	0.0833333	0.166667	0.166667	0.25
	% of partially new	% of partially new	% of partially new	% of partially new	% of partially new	% of partially new	% of partially new	% of partially new						% of partially new	% of partially new	% of partially new	% of partially new						% of partially new	% of partially new	% of partially new	% of partially new	% of partially new	% of partially new	% of partially new	% of partially new			% of partially new	% of partially new	% of partially new	% of partially new	% of partially new	% of partially new	% of partially new	% of partially new			% of partially new	% of partially new	% of partially new	% of partially new	% of partially new	% of partially new	% of partially new
		0	0	0	0	0									0	0	0							0	0	1.33333	0.333333	0						0	0	0.125	0	0						0	0	0.166667	0.25	0.166667
	% of new	% of new	% of new	% of new	% of new	% of new	% of new	% of new						% of new	% of new	% of new	% of new						% of new	% of new	% of new	% of new	% of new	% of new	% of new	% of new			% of new	% of new	% of new	% of new	% of new	% of new	% of new	% of new			% of new	% of new	% of new	% of new	% of new	% of new	% of new
		0	0	0	0	0									0	0.666667	0							0	0	0.333333	2.33333	2.66667						0	0	0	0	0						0	0.0833333	0.25	1	1.41667
	% of total New	% of total New	% of total New	% of total New	% of total New	% of total New	% of total New	% of total New						% of total New	% of total New	% of total New	% of total New						% of total New	% of total New	% of total New	% of total New	% of total New	% of total New	% of total New	% of total New			% of total New	% of total New	% of total New	% of total New	% of total New	% of total New	% of total New	% of total New			% of total New	% of total New	% of total New	% of total New	% of total New	% of total New	% of total New
		0	0	0	0	0									0	0.666667	0							0	0	1.66667	2.66667	2.66667						0	0	0.125	0	0						0	0.0833333	0.416667	1.25	1.58333
	% of unknowns	% of unknowns	% of unknowns	% of unknowns	% of unknowns	% of unknowns	% of unknowns	% of unknowns						% of unknowns	% of unknowns	% of unknowns	% of unknowns						% of unknowns	% of unknowns	% of unknowns	% of unknowns	% of unknowns	% of unknowns	% of unknowns	% of unknowns			% of unknowns	% of unknowns	% of unknowns	% of unknowns	% of unknowns	% of unknowns	% of unknowns	% of unknowns			% of unknowns	% of unknowns	% of unknowns	% of unknowns	% of unknowns	% of unknowns	% of unknowns
intial	0	0	1	0	0.4	0					intial			0	0	0	0					intial	0	0	0	0	0	0				intial	0	0	0	0.125	0	0.25				intial	0.25	0	0.0833333	0	0	0
new		0	0	0	0	0					new				0	0	0					new		0	0	0.333333	0	0.333333				new		0	0	0	0	0				new		0	0.0833333	0	0.0833333	0
	Legend:
[truncated: 43 more columns]

## Sheet: Males
Including unknowns
CVV 21 Branch A											CVV 21 Branch C											CVV 21 Branch D										CVV 87 Branch A										CVV 96 Branch A
Sessions	1	2	3	4	5	6		0			Sessions	1	2	3	4	5	6					Sessions	1	2	3	4	5	6				Sessions	1	2	3	4	5	6	7	0		Sessions	1	2	3	4	5	6	7
A1	1	0.5	0.5	x	0	0					C1	x	1	1	x	1	x					D1	1	1	1	x	1	1				A1	0	0.5	0							A1	1	1	1	1	0
A2	1	1	1	x	1	1					C2	x	1	1	x	1	x					D2	1	1	1	x	1	1				A2	0.5	0.5	0							A2	0.5	1	1	1	0
A3	1	0.5	0.5	x	0.5	0.5					C3	x	1	1	x	1	x					D3	0	0.5	0.5	x	0.5	0.5				A3	1	1	0							A3	1	1	1	1	0
A4	1	1	0	x	0.5	0.5					C4	1	0.5	0.5	x	0.5	x					D4	0	0.5	0.5	x	0.5	0.5				A4	0.5	1	0							A4	0.5	1	1	0.5	0
A5	0.5	0.5	0.5	x	0	0					C5	x	1	1	x	1	x					D5	discard									A5	1	1	0							A5	1	1	1	1	0
A6	1	1	1	x	1	0.5					C6	1	1	1	x	1	x					D6	1	1	1	x	1	1				A6	x	1	0							A6	0.5	1	1	1	0
A7	1	1	0.5	x	0.5	0					C7	0	0	0	x	0.5	x					D7	0	0.5	1	x	1	1				A7	1	1	0							A7	1	0.5	0.5	1	0
A8	1	1	1	x	1	1					C8	1	1	0.5	x	0.5	x					D8	1	1	1	x	x	x														A8	1	1	1	1	0
A9	0.5	0	0	x	0	0																D9	1	1	1	x	1	x														A9	0.5	1	1	1	0
A10	1	1	1	x	1	x																D10	1	1	1	x	1	x														A9'	0	0	0.5	0.5	0
A11	1	1	1	x	1	x																D11	0	0	0	x	1	x
A12	1	1	1	x	1	x																D12	1	1	1	x	1	1
A13	1	1	1	x	0.5	0.5																D11'	0	0	0	x	0.5	0.5
A14	1	0	0	x	0	0																D11''	0	0	0	x	0.5	0.5
A15	0.5	0	0	x	0	0
A16	1	1	x	x	1	x
A17	1	1	x	x	1	x
A18	discard
A19	1	1	x	x	x	x
MU Size	18	15	14	15	13	12		0			MU Size	7	7	7	8	8	0					MU Size	5	6	6	9	9	9				MU Size	6	7	0							MU Size	9	9	10	10	0
Delta		1 to 2	2 to 3	3 to 4	4 to 5	5 to 6					Delta		1 to 2	2 to 3	3 to 4	4 to 5	5 to 6					Delta		1 to 2	2 to 3	3 to 4	4 to 5	5 to 6				Delta		1 to 2	2 to 3	3 to 4	4 to 5	5 to 6				Delta		1 to 2	2 to 3	3 to 4	4 to 5	5 to 6
A1		-0.5	0	x	-0.25	0					C1		0	0	x	0						D1		0	0	x	0	0				A1		0.5	-0.5							A1		0	0	0	-1
A2		0	0	x	0	0					C2		0	0	x	0						D2		0	0	x	0	0				A2		0	-0.5							A2		0.5	0	0	-1
A3		-0.5	0	x	0	0					C3		0	0	x	0						D3		0.5	0	x	0	0				A3		0	-1							A3		0	0	0	-1
A4		0	-1	x	0.5	0					C4		-0.5	0	x	0						D4		0.5	0	x	0	0				A4		0.5	-1							A4		0.5	0	-0.5	-0.5
A5		0	0	x	0.5	0					C5		0	0	x	0						D5										A5		0	-1							A5		0	0	0	-1
A6		0	0	x	0	-0.5					C6		0	0	x	0						D6		0	0	x	0	0				A6		0	-1							A6		0.5	0	0	-1
A7		0	-0.5	x	0	-0.5					C7		0	0	x	0.5						D7		0.5	0.5	x	0	0				A7		0	-1							A7		-0.5	0	0.5	-1
A8		0	0	x	0	0					C8		0	-0.5	x	0						D8		0	0	x	x	x														A8		0	0	0	-1
A9		-0.5	0	x	0	0																D9		0	0	x	0	x														A9		0.5	0	0	-1
A10		0	0	x	0	x																D10		0	0	x	0	x														A9'		0	0.5	0	-0.5
A11		0	0	x	0	x																D11		0	0	x	1	x
A12		0	0	x	0	x																D12		0	0	x	0	0
A13		0	0	x	-0.5	0																D11'		0	0	x	0.5	0
A14		-1	0	x	0	0																D11''		0	0	x	0.5	0
A15		-0.5	0	x	0	0
A16		0	x	x	0	x
A17		0	x	x	0	x
A18
A19		0	x	x	x	x
Reinn/Repaired/New?		1 to 2	2 to 3	3 to 4	4 to 5	5 to 6					Reinn/Repaired/New?		1 to 2	2 to 3	3 to 4	4 to 5	5 to 6					Reinn/Repaired/New?		1 to 2	2 to 3	3 to 4	4 to 5	5 to 6				Reinn/Repaired/New?		1 to 2	2 to 3	3 to 4	4 to 5	5 to 6				Reinn/Repaired/New?		1 to 2	2 to 3	3 to 4	4 to 5	5 to 6
A1		No	No	x	No	No					C1		No	No	x	No						D1		No	No	x	No	No				A1		New	New							A1		No	No	No	No
A2		No	No	x	No	No					C2		No	No	x	No						D2		No	No	x	No	No				A2		No	No							A2		Repaired	Repaired	Repaired	Repaired
A3		No	No	x	No	No					C3		No	No	x	No						D3		New	New	x	New	New				A3		No	No							A3		No	No	No	No
A4		No	No	x	Reinnervated	Reinnervated					C4		No	No	x	No						D4		New	New	x	New	New				A4		Repaired	Repaired							A4		Repaired	Repaired	Repaired	Repaired
A5		No	No	x	No	No					C5		No	No	x	No						D5										A5		No	No							A5		No	No	No	No
A6		No	No	x	No	No					C6		No	No	x	No						D6		No	No	x	No	No				A6		No	No							A6		Repaired	Repaired	Repaired	Repaired
A7		No	No	x	No	No					C7		No	No	x	New						D7		New	New	x	New	New				A7		No	No							A7		No	No	Repaired	Repaired
A8		No	No	x	No	No					C8		No	No	x	No						D8		No	No	x	x	x				0		No	No							A8		No	No	No	No
A9		No	No	x	No	No																D9		No	No	x	No	x				0		No	No							A9		Repaired	Repaired	Repaired	Repaired
A10		No	No	x	No	x																D10		No	No	x	No	x				0		No	No							A9'		No	New	New	New
A11		No	No	x	No	x																D11		No	No	x	New	x				0		No	No
A12		No	No	x	No	x																D12		No	No	x	No	No
A13		No	No	x	No	No																D11'		No	No	x	New	New
A14		No	No	x	No	No																D11''		No	No	x	New	New
A15		No	No	x	No	No
A16		No	x	x	No	x
A17		No	x	x	No	x
A18
A19		No	x	x	x	x
# of initial NMJs	% of innervated NMJs	% of innervated NMJs	% of innervated NMJs	% of innervated NMJs	% of innervated NMJs	% of innervated NMJs					# of initial NMJs	% of innervated NMJs	% of innervated NMJs	% of innervated NMJs	% of innervated NMJs	% of innervated NMJs						# of initial NMJs	% of innervated NMJs	% of innervated NMJs	% of innervated NMJs	% of innervated NMJs	% of innervated NMJs	% of innervated NMJs				# of initial NMJs	% of innervated NMJs	% of innervated NMJs	% of innervated NMJs							# of initial NMJs	% of innervated NMJs	% of innervated NMJs	% of innervated NMJs	% of innervated NMJs	% of innervated NMJs
18	0.833333	0.666667	0.388889	0	0.444444	0.111111					7	0.428571	0.857143	0.714286	0	0.714286						7	1	1	1	0	0.857143	0.571429				6	0.5	0.666667	0							9	0.555556	0.444444	0.444444	0.444444	0
	% of partial	% of partial	% of partial	% of partial	% of partial	% of partial						% of partial	% of partial	% of partial	% of partial	% of partial							% of partial	% of partial	% of partial	% of partial	% of partial	% of partial					% of partial	% of partial	% of partial								% of partial	% of partial	% of partial	% of partial	% of partial
	0.166667	0.166667	0.222222	0	0.222222	0.222222						0	0.142857	0.285714	0	0.428571							0	0.428571	0.285714	0	0.571429	0.571429					0.333333	0.166667	0								0.444444	0.111111	0.111111	0	0
	% of in + par	% of in + par	% of in + par	% of in + par	% of in + par	% of in + par						% of in + par	% of in + par	% of in + par	% of in + par	% of in + par							% of in + par	% of in + par	% of in + par	% of in + par	% of in + par	% of in + par					% of in + par	% of in + par	% of in + par								% of in + par	% of in + par	% of in + par	% of in + par	% of in + par
	1	0.833333	0.611111	0	0.666667	0.333333						0.428571	1	1	0	1.14286							1	1.42857	1.28571	0	1.42857	1.14286					0.833333	0.833333	0								1	0.555556	0.555556	0.444444	0
	% of repaired	% of repaired	% of repaired	% of repaired	% of repaired	% of repaired						% of repaired	% of repaired	% of repaired	% of repaired	% of repaired							% of repaired	% of repaired	% of repaired	% of repaired	% of repaired	% of repaired					% of repaired	% of repaired	% of repaired								% of repaired	% of repaired	% of repaired	% of repaired	% of repaired
		0	0	0	0	0							0	0	0	0								0	0	0	0	0						0.166667	0									0.444444	0.444444	0.555556	0
	% of partially reinnervated	% of partially reinnervated	% of partially reinnervated	% of partially reinnervated	% of partially reinnervated	% of partially reinnervated						% of partially reinnervated	% of partially reinnervated	% of partially reinnervated	% of partially reinnervated	% of partially reinnervated							% of partially reinnervated	% of partially reinnervated	% of partially reinnervated	% of partially reinnervated	% of partially reinnervated	% of partially reinnervated					% of partially reinnervated	% of partially reinnervated	% of partially reinnervated								% of partially reinnervated	% of partially reinnervated	% of partially reinnervated	% of partially reinnervated	% of partially reinnervated
		0	0	0	0.0555556	0.0555556							0	0	0	0								0	0	0	0	0						0	0									0	0	0	0
	% of reinnervated	% of reinnervated	% of reinnervated	% of reinnervated	% of reinnervated	% of reinnervated						% of reinnervated	% of reinnervated	% of reinnervated	% of reinnervated	% of reinnervated							% of reinnervated	% of reinnervated	% of reinnervated	% of reinnervated	% of reinnervated	% of reinnervated					% of reinnervated	% of reinnervated	% of reinnervated								% of reinnervated	% of reinnervated	% of reinnervated	% of reinnervated	% of reinnervated
		0	0	0	0	0							0	0	0	0								0	0	0	0	0						0	0									0	0	0	0
	% of total reinnervated	% of total reinnervated	% of total reinnervated	% of total reinnervated	% of total reinnervated	% of total reinnervated						% of total reinnervated	% of total reinnervated	% of total reinnervated	% of total reinnervated	% of total reinnervated							% of total reinnervated	% of total reinnervated	% of total reinnervated	% of total reinnervated	% of total reinnervated	% of total reinnervated					% of total reinnervated	% of total reinnervated	% of total reinnervated								% of total reinnervated	% of total reinnervated	% of total reinnervated	% of total reinnervated	% of total reinnervated
		0	0	0	0.0555556	0.0555556							0	0	0	0								0	0	0	0	0						0	0									0	0	0	0
Total repaired/rein		0	0	0	0.0555556	0.0555556					Total repaired/rein		0	0	0	0						Total repaired/rein		0	0	0	0	0				Total repaired/rein		0.166667	0							Total repaired/rein		0.444444	0.444444	0.555556	0
	% of partially new	% of partially new	% of partially new	% of partially new	% of partially new	% of partially new						% of partially new	% of partially new	% of partially new	% of partially new	% of partially new							% of partially new	% of partially new	% of partially new	% of partially new	% of partially new	% of partially new					% of partially new	% of partially new	% of partially new								% of partially new	% of partially new	% of partially new	% of partially new	% of partially new
		0	0	0	0	0							0	0	0	0.142857								0.428571	0.285714	0	0.571429	0.571429						0.166667	0									0	0.111111	0.111111	0
	% of new	% of new	% of new	% of new	% of new	% of new						% of new	% of new	% of new	% of new	% of new							% of new	% of new	% of new	% of new	% of new	% of new					% of new	% of new	% of new								% of new	% of new	% of new	% of new	% of new
		0	0	0	0	0							0	0	0	0								0	0.142857	0	0.285714	0.142857						0	0									0	0	0	0
	% of total New	% of total New	% of total New	% of total New	% of total New	% of total New						% of total New	% of total New	% of total New	% of total New	% of total New							% of total New	% of total New	% of total New	% of total New	% of total New	% of total New					% of total New	% of total New	% of total New								% of total New	% of total New	% of total New	% of total New	% of total New
		0	0	0	0	0							0	0	0	0.142857								0.428571	0.428571	0	0.857143	0.714286						0.166667	0									0	0.111111	0.111111	0
	% of unknowns	% of unknowns	% of unknowns	% of unknowns	% of unknowns	% of unknowns						% of unknowns	% of unknowns	% of unknowns	% of unknowns	% of unknowns							% of unknowns	% of unknowns	% of unknowns	% of unknowns	% of unknowns	% of unknowns					% of unknowns	% of unknowns	% of unknowns								% of unknowns	% of unknowns	% of unknowns	% of unknowns	% of unknowns
intial	0	0	0.166667	1	0.0555556	0.333333					intial	0.571429	0	0	1	0						intial	0	0	0	1	0.142857	0.428571				intial	0.166667	0	0							intial	0	0	0	0	0
new		0	0	0	0	0					new		0	0	0.142857	0						new		0	0	0.857143	0	0.142857				new		0	0							new		0	0	0	0
	Legend:

## Sheet: Compilation
		Innervated
		CVV21	CVV21-C	CVV21-D	CVV32-A	CVV32-B	CVV34-A	CVV34-B	CVV34-C	CVV34-D	CVV34-E	CVV62	CVV76-A	CVV76-B	CVV87	CVV96	CVV105	CVV107	CVV113	CVV152
Sessions	1	100	100	100	100		100	100	100	100	100	100	100	100	100	100	100	100	100	100
	2	83	100	100	100		100	88	92	100	92	89	90	100	83	56	95	100	100	100
	3	78	100	100	100	100	100	88	83	92	85	78	90	100		56	95	100	100	100
	4	67	100	100	100	100	100	88	83	83	85	72	10	100		44	95	100	100	86
	5	67	100	100	100	100	100		83		85	61		100			95	100	100	43
	6	61		100			100		75		85	61		25				100		14
		Reinnervated/Repaired
		CVV21	CVV21-C	CVV21-D	CVV32-A	CVV32-B	CVV34-A	CVV34-B	CVV34-C	CVV34-D	CVV34-E	CVV62	CVV76-A	CVV76-B	CVV87	CVV96	CVV105	CVV107	CVV113	CVV152
Sessions	1
	2	0	0	0	0		0	0	0	0	0	0	0	0	17	44	5	0	0	0
	3	0	0	0	0		0	0	17	0	8	11	0	0		44	5	0	0	0
	4	0	0	0	0	0	0	0	17	0	8	17	0	0		56	5	0	0	14
	5	6	0	0	0	0	0		17		8	17		0			5	0	0	14
	6	6		0			0		25		8	17		0				0		14
		New
		CVV21	CVV21-C	CVV21-D	CVV32-A	CVV32-B	CVV34-A	CVV34-B	CVV34-C	CVV34-D	CVV34-E	CVV62	CVV76-A	CVV76-B	CVV87	CVV96	CVV105	CVV107	CVV113	CVV152
Sessions	1
	2	0	0	43	0		0	0	0	0	46	6	0	0	17	0	0	0	17	0
	3	0	0	43	0		0	0	17	33	54	50	0	0		11	0	0	67	0
	4	0	0	57	0	0	200	13	42	58	62	50	0	25		11	0	0	67	14
	5	0	14	86	0	67	266.7		133		62	39		50			0	0	67	14
	6	0		86			300		158		85	33		50				0		14
		Denervated
		CVV21	CVV21-C	CVV21-D	CVV32-A	CVV32-B	CVV34-A	CVV34-B	CVV34-C	CVV34-D	CVV34-E	CVV62	CVV76-A	CVV76-B	CVV87	CVV96	CVV105	CVV107	CVV113	CVV152
Sessions	1	0	0	0	0		0	0	0	0	0	0	0	0	0	0	0	0	0	0
	2	-17	0	0	0		0	-12	-8	0	-8	-11	-10	0	0	0	0	0	0	0
	3	-22	0	0	0	0	0	-12	0	-8	-7	-11	-10	0		0	0	0	0	0
	4	-33	0	0	0	0	0	-12	0	-17	-7	-11	-90	0		0	0	0	0	0
	5	-27	0	0	0	0	0		-8		-7	-33		0			0	0	0	-43
	6	-33		0			0		-8		-7	-39		-75				0		-72
