# Supplementary material for: Dynamic neuromuscular remodeling precedes motor-unit loss in a mouse model of ALS
Source: eLife journal article supplement (doi:10.7554/elife.41973), 2018-10-15
Supplement: supp [file Figure4_Source2.data.xlsx]

## Sheet: Sheet1
	Branch order	Loss	Loss + ParLoss	Gain	Total # of NMJs
	1	2	4	19	30
	2	4	7	15	46
	3	6	10	17	52
	4	9	18	11	48
	5	9	13	9	44
	6	2	3	1	11
	7	4	7	2	12
	8	2	5	2	10
		38	67	76	253
	% of NMJs
	Branch order	Loss	Loss + ParLoss	Gain
	1	0.0666667	0.133333	0.633333
	2	0.0869565	0.152174	0.326087
	3	0.115385	0.192308	0.326923
	4	0.1875	0.375	0.229167
	5	0.204545	0.295455	0.204545
	6	0.181818	0.272727	0.0909091
	7	0.333333	0.583333	0.166667
	8	0.2	0.5	0.2
