# Supplementary material for: Dynamic neuromuscular remodeling precedes motor-unit loss in a mouse model of ALS
Source: eLife journal article supplement (doi:10.7554/elife.41973), 2018-10-15
Supplement: supp [file Figure4_supp.1_Source.data1.xlsx]

## Sheet: Sheet1
Aligned on session
% of Gains								% of Loss
Session #		1 to 2	2 to 3	3 to 4	4 to 5	5 to 6		Session #		1 to 2	2 to 3	3 to 4	4 to 5	5 to 6
CVV21		0	0	0.0151515	0.0151515	0		CVV21		0.181818	0.0909091	0.0454545	0.0454545	0.0606061
CVV21-C		0	0	0.0357143	0.0357143			CVV21-C		0.0714286	0.0714286	0	0
CVV21-D		0.214286	0.0714286	0.142857	0.142857	0		CVV21-D		0	0	0	0	0
CVV87		0.2	0					CVV87		0	1.2
CVV96		0.285714	0.0714286	0.0714286	0			CVV96		0.0714286	0	0.0714286	1.28571
CVV105		0.025641	0	0	0	0		CVV105		0	0.025641	0	0.025641	1.05
CVV107		0	0	0	0	0		CVV107		0	0	0	0	0.0714286
CVV113		0.14	0.318182	0	0	0		CVV113		0.0909091	0	0	0
CVV152		0	0	0.153846	0.0769231	0		CVV152		0.0769231	0	0.153846	0.461538	0.230769
CVV32-A		0	0	0	0	0		CVV32-A		0	0	0.1	0	0.9
CVV32-B				0	0.666667	0		CVV32-B				0	0	1.66667
CVV34-A		0	0	1.16667	1.5	0.5		CVV34-A		0	0	0	0.166667	0
CVV34-B		0	0	0.0666667	0			CVV34-B		0.0666667	0	0.133333	0.866667
CVV34-C		0	0.25	0.25	1	0.409091		CVV34-C		0.0454545	0	0	0.0909091	0.0909091
CVV34-D		0	0.166667	0.375	0	0		CVV34-D		0	0.0833333	0.0833333	1.375	0
CVV34-E		0.44	0.16	0.08	0	0.2		CVV34-E		0.08	0	0	0	0
CVV62		0.0735294	0.455882	0.0294118	0.0294118	0		CVV62		0.102941	0.0735294	0	0.294118	0.0588235
CVV76-A		0	0	0	0	0		CVV76-A		0.1	0.05	0.8	0.025	0.025
CVV76-B		0	0	0.25	0.125	0.125		CVV76-B		0	0	0.125	0.25	0.375
Total% of change
Session #		1 to 2	2 to 3	3 to 4	4 to 5	5 to 6
CVV21		0.181818	0.0909091	0.0606061	0.0606061	0.0606061
CVV21-C		0.0714286	0.0714286	0.0357143	0.0357143
CVV21-D		0.214286	0.0714286	0.142857	0.142857	0
CVV87		0.2	1.2
CVV96		0.357143	0.0714286	0.142857	1.28571
CVV105		0.025641	0.025641	0	0.025641	1.05
CVV107		0	0	0	0	0.0714286
CVV113		0.227273	0.318182	0	0
CVV152		0.0769231	0	0.307692	0.538462	0.230769
CVV32-A		0	0	0.1	0	0.9
CVV32-B				0	0.666667	1.66667
CVV34-A		0	0	1.16667	1.66667	0.5
CVV34-B		0.0666667	0	0.2	0.866667
CVV34-C		0.0454545	0.25	0.25	1.09091	0.5
CVV34-D		0	0.25	0.458333	1.375
CVV34-E		0.52	0.16	0.08	0	0.2
CVV62		0.176471	0.529412	0.0294118	0.323529	0.0588235
CVV76-A		0.1	0.05	0.8	0.025	0.025
CVV76-B		0	0	0.375	0.375	0.5
Delta % of change
Session #		1 to 2	2 to 3	3 to 4	4 to 5	5 to 6
CVV21		-0.181818	-0.0909091	-0.030303	-0.030303	-0.0606061
CVV21-C		-0.0714286	-0.0714286	0.0357143	0.0357143
CVV21-D		0.214286	0.0714286	0.142857	0.142857	0
CVV87		0.2	-1.2
CVV96		0.214286	0.0714286	0	-1.28571
CVV105		0.025641	-0.025641	0	-0.025641	-0.974359
CVV107		0	0	0	0	-0.0714286
CVV113		0.0454545	0.318182	0	0
CVV152		-0.0769231	0	0	-0.384615	-0.230769
CVV32-A		0	0	-0.1	0	-0.9
CVV32-B					0.666667	-1.66667
CVV34-A		0	0	1.16667	1.33333	0.5
CVV34-B		-0.0666667	0	-0.0666667	-0.866667
CVV34-C		-0.0454545	0.25	0.25	0.909091	0.318182
CVV34-D		0	0.0833333	0.291667	-1.375
CVV34-E		0.36	0.16	0.08	0	0.2
CVV62		-0.0294118	0.382353	0.0294118	-0.264706	-0.0588235
CVV76-A		-0.1	-0.05	-0.8	-0.025	-0.025
CVV76-B		0	0	0.125	-0.125	-0.25
Change Ratio		100 % = all gains ; 0% = all losses
Session #		1 to 2	2 to 3	3 to 4	4 to 5	5 to 6
CVV21		0	0	0.25	0.25	0
CVV21-C		0	0	1	1
CVV21-D		1	1	1	1
CVV87		1	0
CVV96		0.8	1	0.5	0
CVV105		1	0		0	0
CVV107						0
CVV113		0.6	1
CVV152		0		0.5	0.142857	0
CVV32-A				0		0
CVV32-B					1	0
CVV34-A				1	0.9	1
CVV34-B		0		0.333333	0
CVV34-C		0	1	1	0.916667	0.818182
CVV34-D			0.666667	0.818182	0
CVV34-E		0.846154	1	1		1
CVV62		0.416667	0.861111	1	0.0909091	0
CVV76-A		0	0	0	0	0
CVV76-B				0.666667	0.333333	0.25
