# Supplementary material for: Dynamic neuromuscular remodeling precedes motor-unit loss in a mouse model of ALS
Source: eLife journal article supplement (doi:10.7554/elife.41973), 2018-10-15
Supplement: supp [file Figure5_Source.data1.xlsx]

## Sheet: Fig 4_source.data
CVV 21	SOD1-YFP-H	M		Branch A					Sholl analysis (no partial)
Sessions	1	2	3	4	5	6			Branch order	D from 1st loss	Loss?	Partial Loss	Gained?	Gained axo/term?	Fragmented axon?	Loss T0?	Loss? T+1	Loss? T+2	Loss? T+3	Loss? T+4
A1	1	0.5	0.5	x	0	0			8	252.291	Yes	Yes	No		Frag	No	No	No	Yes	Yes
A2	1	1	1	x	1	1			8	200.378	No	No	No			No	No	No	No	No
A3	1	0.5	0.5	x	0.5	0.5			7	124.863	No	Yes	No			No	No	No	No	No
A4	1	1	0	x	0.5	0.5			7	175.507	Yes	No	No		Frag	No	Yes	Yes	Yes	Yes
A5	0.5	0.5	0.5	x	0	0			7	109.965	Yes	No	No			No	No	No	Yes	Yes
A6	1	1	1	x	1	0.5			5	80.496	No	Yes	No			No	No	No	No	No
A7	1	1	0.5	x	0.5	0			6	65.483	Yes	Yes	No			No	No	No	No	Yes
A8	1	1	1	x	1	1			5	21.569	No	No	No			No	No	No	No	No
A9	0.5	0	0	x	0	0			6	0	Yes	No	No			Center	Center	Center	Center	Center
A10	1	1	1	x	1	x			3	107.153	No	No	No			No	No	No	No	No
A11	1	1	1	x	1	x			4	124.146	No	No	No			No	No	No	No	No
A12	1	1	1	x	1	x			4	122.874	No	No	No			No	No	No	No	No
A13	1	1	1	x	0.5	0.5			4	64.592	No	Yes	No			No	No	No	No	No
A14	1	0	0	x	0	0			4	0	Yes	No	No		Frag	Center	Center	Center	Center	Center
A15	0.5	0	0	x	0	0			4	0	Yes	No	No		Frag	Center	Center	Center	Center	Center
A16	1	1	x	x	1	x			3	131.63	No	No	No			No	No	No	No	No
A17	1	1	x	x	1	x			3	166.988	No	No	No			No	No	No	No	No
A18	discard
A19	1	1	x	x	x	x			2	145.26	No	No	No			No	No	No	No	No
MU Size	18	15	14	x	13	12
CVV 21	SOD1-YFP-H	M		Branch C					Sholl analysis (no partial)
Sessions	1	2	3	4	5	6			Branch order	D from 1st loss	Loss?	Partial Loss	Gained?	Gained axo/term?	Fragmented axon?	Loss T0?	Loss? T+1	Loss? T+2	Loss? T+3	Loss? T+4
C1	x	1	1	x	1	x			4		No	No	No				No initial loss
C2	x	1	1	x	1	x			4		No	No	No
C3	x	1	1	x	1	x			3		No	No	No
C4	1	0.5	0.5	x	0.5	x			2		No	Yes	No
C5	x	1	1	x	1	x			4		No	No	No
C6	1	1	1	x	1	x			4		No	No	No
C7	0	0	0	x	0.5	x			3		No	No	Yes	Axo
C8	1	1	0.5	x	0.5	x			2		No	Yes	No
MU Size	7	7	7	x	8
CVV21	SOD1-YFP-H	M		Branch D					Sholl analysis (no partial)
Sessions	1	2	3	4	5	6			Branch order	D from 1st loss			Gained?	Gained axo/term?	Fragmented axon?		Loss? T+1	Loss? T+2	Loss? T+3	Loss? T+4
D1	1	1	1	x	1	1			4				No				No initial loss
D2	1	1	1	x	1	1			4				No
D3	0	0.5	0.5	x	0.5	0.5			5				Yes	Axo
D4	0	0.5	0.5	x	0.5	0.5			5				Yes	Axo
D5	discard												No
D6	1	1	1	x	1	1			3				No
D7	0	0.5	1	x	1	1			2				Yes	Term
D8	1	1	1	x	x	x			2				No
D9	1	1	1	x	1	x			3				No
D10	1	1	1	x	1	x			3				No
D11	0	0	0	x	1	x			3				Yes	axo
D12	1	1	1	x	1	1			3				No
D11'	0	0	0	x	0.5	0.5			3				Yes	axo
D11''	0	0	0	x	0.5	0.5			3				Yes	axo
MU Size	5	6	6	x	9	9
CVV 32	SOD1-YFP-H	F		Branch A					Sholl analysis (no partial)
Sessions	1	2	3	4	5	6			Branch order	D from 1st loss	Loss?	Partial Loss	Gained?	Gained axo/term?	Fragmented axon?	Loss T0?	Loss? T+1	Loss? T+2	Loss? T+3	Loss? T+4
A1	1	1	x	1	1	sync loss			2		No	No	No				No initial loss
A2	1	1	x	1	1	sync loss			2		No	No	No
A3	1	1	x	1	x	sync loss			2		No	No	No
A4	1	1	x	1	x	sync loss			2		No	No	No
A5	1	1	x	0.5	0.5	sync loss			1		No	Yes	No
MU Size	5	5	x	5	5	0
CVV 32	SOD1-YFP-H	F		Branch B					Sholl analysis (no partial)
Sessions	3	4	5	6					Branch order	D from 1st loss				Gained axo/term?	Fragmented axon?	Loss T0?	Loss? T+1	Loss? T+2	Loss? T+3	Loss? T+4
B1	1	1	1	sync loss					2				No				No initial loss
B2	1	1	1	sync loss					2				No
B3	1	1	1	sync loss					1				No
B2'	0	0	1	sync loss					2				Yes
B3'	0	0	1	sync loss					1				Yes
MU Size	3	3	5	0
CVV 34	SOD1-YFP-H	F		Branch A					Sholl analysis (no partial)
Sessions	1	2	3	4	5	6			Branch order	D from 1st loss	Loss?	Partial Loss	Gained?	Gained axo/term?	Fragmented axon?	Loss T0?	Loss? T+1	Loss? T+2	Loss? T+3	Loss? T+4
B1/A1	0	0	0	0	1	1			1	173.225	No	No	Yes	Axo
B2/A2	0	0	0	0.5	0	0			1	232.273	Yes	No	Yes	Axo
A3	1	1	1	1	1	1			1	270.659	No	No	No			Single event
B4/A4	0	0	0	0.5	1	1			1	143.717	No	No	Yes	Axo
A5	1	1	1	1	1	1			2	104.533	No	No	No
A6	1	1	1	1	1	1			2	101.515	No	No	No
A5'	0	0	0	0.5	1	1			2	41.775	No	No	Yes	Axo
A5''	0	0	0	1	1	1			2	79.854	No	No	Yes	Axo
A5'''	0	0	0	0.5	1	1			2	25.315	No	No	Yes	Term/axo
B9/A9	0	0	0	0	1	1			2	77.094	No	No	Yes	Axo
B7/A7	0	0	0	x	1	x			2	0	No	No	Yes	Axo
B10/A10	0	0	0	0	0	1			2	153.88	No	No	Yes	Axo
B11/A11	0	0	0	0	0.5	1			2	207.6	No	No	Yes	Axo
MU Size	3	3	3	9	11	12
CVV 34	SOD1-YFP-H	F		Branch B					Sholl analysis (no partial)								T0 = 2
Sessions	1	2	3	4	5	6			Branch order	D from 1st loss	Loss?	Partial Loss	Gained?	Gained axo/term?	Fragmented axon?	Loss T0?	Loss? T+1	Loss? T+2	Loss? T+3	Loss? T+4
B1/A1	1	1	1	1	sync loss	sync loss			5	173.225	No	No	No			No	No	No	No	No
B2/A2	1	1	1	0.5	sync loss	sync loss			5	232.273	No	Yes	No			No	No	No	No	No
B4	1	1	1	0.5	sync loss	sync loss			4	143.717	No	Yes	No			No	No	No	No	No
B8	1	1	1	1	sync loss	sync loss			3	68.85	No	No	No			No	No	No	No	No
B9	1	1	1	1	sync loss	sync loss			3	77.094	No	No	No			No	No	No	No	No
B7/A7	0.5	0	0	x	sync loss	sync loss			3	0	Yes	No	No			Center	Center	Center	Center	Center															Center
B10	1	1	1	1	sync loss	sync loss			2	153.88	No	No	No			No	No	No	No	No
B11	1	1	1	1	sync loss	sync loss			2	207.6	No	No	No			No	No	No	No	No
B9'	0	0	0	0.5	sync loss	sync loss			3	57.031	No	No	Yes			No	No	No	No	No
MU Size	8	7	7	8	0	0
CVV 34	SOD1-YFP-H	F		Branch C					Sholl analysis (no partial)								T0=2 / 4
Sessions	1	2	3	4	5	6			Branch order	D from 1st loss	Loss?	Partial Loss	Gained?	Gained axo/term?	Fragmented axon?	Loss T0?	Loss? T+1	Loss? T+2	Loss? T+3	Loss? T+4
C2	1	1	1	1	1	1			4	218.35	No	No	No			No	No	No	No	No
C3	1	1	1	1	1	1			4	193.867	No	No	No			No	No	No	No	No
C4	1	1	1	1	1	0.5			4	239.331	No	Yes	No			No	No	No	No	No
C6	0.5	0	1	1	1	1			3	0	Yes	No	No		Frag	Center	Center	Center	Center	Center															Center
C7	1	1	1	1	1	1			2	79.97	No	No	No			No	No	No	No	No
C14	x	1	1	1	1	1			5	295.586	No	No	No			No	No	No
C15	x	1	1	1	1	1			4	204.264	No	No	No			No	No	No
C16	1	1	1	1	0.5	1			3	37.912	No	Yes	No			No	No	No
C19	1	1	1	1	1	1			2	111.116	No	No	No			No	No	No
C20	1	1	1	1	1	1			3	169.797	No	No	No			No	No	No
C21	x	0.5	x	1	1	1			5	292.621	No	No	No			No	No	No
C24	1	1	1	1	1	1			1	394.217	No	No	No			No	No	No	No	No
D5	0	0	1	1	1	0.5			3	45.916	No	Yes	Yes	Axo		No	No	No	No	No
C6'	0	0	x	1	1	1			3	27.19	No	No	Yes	Axo		No	No	No	No	No
D1''	0	0	0	0	0.5	0.5			2	294.57	No	No	Yes	Term		No	No	No	No	No
D11	0	0	0	0	1	1			1	246.378	No	No	Yes	Axo		No	No	No	No	No
D12	0	0	0	0	1	1			1	258.92	No	No	Yes	Axo		No	No	No	No	No
C16'	x	0	0	1	x	1			3	25.114	No	No	Yes	Axo		No	No	No
D18	0	0	0	0	1	1			3	62.31	No	No	Yes	Axo		No	No	No
C20'	0	0	0	0.5	1	1			3	126.42	No	No	Yes	Axo		No	No	No
C20''	0	0	0	0	0.5	1			3	117.805	No	No	Yes	Axo		No	No	No
D23	x	0	x	0	1	1			4	183.627	No	No	Yes	Axo		No	No	No
D23'	x	0	x	0	0.5	1			4	215.894	No	No	Yes	Axo		No	No	No
C19'	0	0	0	0.5	0	0			2	146.638	Yes	No	Yes	Axo		No	Yes	Yes
C19''	0	0	0	0	0	1			2	123.881	No	No	Yes	Axo		No	No	No
C25	0	0	0	0	1	1			1	374.502	No	No	Yes	Axo		No	No	No	No	No
C25'	0	0	0	0	1	1			1	418.144	No	No	Yes	Axo		No	No	No	No	No
C25''	0	0	0	0	1	1			1	374.719	No	No	Yes	Axo		No	No	No	No	No
C28	0	0	0	0	0	1			1	436.856	No	No	Yes	Axo		No	No	No	No	No
C28'	0	0	0	0	0	1			1	431.131	No	No	Yes	Axo		No	No	No	No	No
C26	0	0	0	0	1	1			1	275.677	No	No	Yes	Axo		No	No	No	No	No
C26'	0	0	0	0	1	1			1	256.033	No	No	Yes	Axo		No	No	No	No	No
MU Size	12	11	14	17	28	31
																	T0=2
CVV 34	SOD1-YFP-H	F		Branch D					Sholl analysis (no partial)
Sessions	1	2	3	4	5	6			Branch order	D from 1st loss	Loss?	Partial Loss	Gained?	Gained axo/term?	Fragmented axon?	Loss T0?	Loss? T+1	Loss? T+2	Loss? T+3	Loss? T+4
D1	1	1	1	1	sync loss	sync loss			4	533.42	No	No	No			No	No	No
D5	1	1	0	0	sync loss	sync loss			4	45.561	Yes	No	No			No	Yes	Yes
D8	1	1	1	1	sync loss	sync loss			3	215.948	No	No	No			No	No	No
D9	1	1	1	1	sync loss	sync loss			4	234.055	No	No	No			No	No	No
D10	1	1	1	1	sync loss	sync loss			4	197.337	No	No	No			No	No	No
D11	1	1	1	1	sync loss	sync loss			3	242.898	No	No	No			No	No	No
D12	1	1	1	1	sync loss	sync loss			3	258.688	No	No	No			No	No	No
D13	x	1	x	1	sync loss	sync loss			2	470.067	No	No	No			No
D17	x	1	1	0	sync loss	sync loss			3	0	Yes	No	No			Center																			Center
D18	1	1	1	1	sync loss	sync loss			3	59.014	No	No	No			No
D23	x	1	x	1	sync loss	sync loss			3	185.39	No	No	No			No
D27	x	1	x	1	sync loss	sync loss			3	220.724	No	No	No			No
D1'	0	0	0.5	1	sync loss	sync loss			4	460.125	No	No	Yes	Axo		No	No	No
D1''	0	0	0	0.5	sync loss	sync loss			4	400.348	No	No	Yes	Axo		No	No	No
D1'''	0	0	0.5	1	sync loss	sync loss			4	290.514	No	No	Yes	Axo		No	No	No
D8'	0	0	0	1	sync loss	sync loss			3	295.823	No	No	Yes	?		No	No	No
D10'	0	0	0	1	sync loss	sync loss			4	153.117	No	No	Yes	Axo		No	No	No
D23'	x	0	x	1	sync loss	sync loss			3	155.065	No	No	Yes	?		No
D23''	x	0	x	1	sync loss	sync loss			3	194.972	No	No	Yes	Axo		No
MU Size	12	12	15	17	0	0
CVV 34	SOD1-YFP-H	F		Branch E					Sholl analysis (no partial)								T0=2
Sessions	1	2	3	4	5	6			Branch order	D from 1st loss	Loss?	Partial Loss	Gained?	Gained axo/term?	Fragmented axon?	Loss T0?	Loss? T+1	Loss? T+2	Loss? T+3	Loss? T+4
E1	1	1	1	1	1	1			6		No	No	No
E2	1	1	1	1	1	1			6		No	No	No
E3	1	0	0	0	0	0			5		Yes	No	No
E4	1	1	x	1	1	1			7		No	No	No
E5	1	1	x	1	1	1			7		No	No	No				Single event
E6	1	1	x	1	1	1			6		No	No	No
E7	1	1	1	1	1	1			5		No	No	No
E8	1	1	1	1	1	1			4		No	No	No
E10	1	1	x	1	1	1			5		No	No	No
E9	1	1	x	1	1	1			5		No	No	No
E11	1	1	1	1	1	1			2		No	No	No
E12	0.5	0.5	1	1	1	1			1		No	No	No
E13	x	x	1	x	1	1			1		No	No	No
E2'	0	0	0	1	1	1			6		No	No	Yes	Axo
E3'	0	0	1	1	1	1			5		No	No	Yes	Axo
E3'''	0	1	1	1	1	1			5		No	No	Yes	Axo
E3''''	0	0.5	1	1	1	1			5		No	No	Yes	Axo
E7'	0	0	0	0	0	1			5		No	No	Yes	Axo
E7''	0	0	0	0	0	0.5			5		No	No	Yes	Axo
E8'	0	1	1	1	1	1			4		No	No	Yes	Axo
E8''	0	1	1	1	1	1			4		No	No	Yes	Axo
E10''	0	1	1	1	1	1			4		No	No	Yes	Axo
E10'''	0	0	0	0	0	1			4		No	No	Yes	Axo
E12'	0	1	1	1	1	1			1		No	No	Yes	Axo
MU Size	13	18	19	20	20	23
CVV 62	SOD1-YFP-H	F		Branch A					Sholl analysis (no partial)								T0=2
Sessions	1	2	3	4	5	6			Branch order	D from 1st loss	Loss?	Partial Loss	Gained?	Gained axo/term?	Fragmented axon?	Loss T0?	Loss? T+1	Loss? T+2	Loss? T+3	Loss? T+4
A1	x	1	1	1	0.5	0.5			8	417.536	No	Yes	No			No	No	No	No	No
A2	x	0.5	1	1	1	1			8	377.869	No	No	No			No	No	No	No	No
A3	x	0.5	1	1	0	0			7	393.307	Yes	No	No			No	No	No	Yes	Yes
A4	x	1	0.5	0.5	1	1			7	286.75	No	Yes	No			No	No	No	No	No
A5	1	1	1	1	1	1			7	279.609	No	No	No			No	No	No	No	No
A6	1	1	1	1	1	1			5	186.65	No	No	No			No	No	No	No	No
A7	1	1	1	1	1	1			5	148.307	No	No	No			No	No	No	No	No
A8	1	1	1	1	1	1			5	82.902	No	No	No			No	No	No	No	No
A9'	1	0	0	0	0	0			3	0	Yes	No	No			Center	Center	Center	Center	Center															Center
A10	1	1	1	1	1	1			2	138.731	No	No	No			No	No	No	No	No
A11	1	x	1	1	1	1			3	268.155	No	No	No			No	No	No	No	No
A12	1	x	0.5	1	x	x			3	318.646	No	Yes	No			No	No	No	No	No
A13	1	1	1	1	0.5	0.5			3	412.834	No	Yes	No			No	No	No	No	No
A14	1	1	1	1	0	x			5	587.849	Yes	No	No			No	No	No	Yes	Yes
A15	1	x	1	1	1	x			5	610.423	No	No	No			No	No	No	No	No
A16	1	1	1	1	1	x			5	706.321	No	No	No			No	No	No	No	No
A17	1	1	1	1	1	x			5	724.45	No	No	No			No	No	No	No	No
A2'	x	0	1	1	0	0			8	433.701	Yes	No	Yes	Axo		No	No	No	Yes	Yes
A2''	x	0	1	1	1	1			8	455.931	No	No	Yes	Axo		No	No	No	No	No
A3'	x	0	1	1	1	0			7	362.654	Yes	No	Yes	Axo		No	No	No	No	Yes
A4'	x	0	1	1	1	1			7	264.018	No	No	Yes	Axo		No	No	No	No	No
A6'	0	0	1	1	0	0			5	200.108	Yes	No	Yes	Axo		No	No	No	Yes	Yes
A6''	0	0	1	1	1	1			5	254.428	No	No	Yes	Term		No	No	No	No	No
A9	0	1	1	1	1	1			3	33.632	No	No	Yes	Axo		No	No	No	No	No
A10'	0	0	0.5	0.5	0.5	0.5			2	81.474	No	No	Yes	Axo		No	No	No	No	No
A11'	1	x	0	0	0	0			3	287.683	Yes	No	No			No	Yes	Yes	Yes	Yes
A11''	0	x	0.5	0.5	0.5	0.5			3	240.612	No	No	Yes	Axo		No	No	No	No	No
MU Size	18	19	25	25	21	20
CVV 76	SOD1-YFP-H	F		Branch A					Sholl analysis (no partial)								T0=2
Sessions	1	2	3	4	5	6			Branch order	D from 1st loss	Loss?	Partial Loss	Gained?	Gained axo/term?	Fragmented axon?	Loss T0?	Loss? T+1	Loss? T+2	Loss? T+3	Loss? T+4
A1	1	1	1	0	x	sync loss			5	295.471	Yes	No	No			No	No	Yes	Yes
A2	1	1	1	0	x	sync loss			5	296.647	Yes	No	No			No	No	Yes	Yes
A3	1	1	1	0	x	sync loss			4	253.987	Yes	No	No			No	No	Yes	Yes
A4	1	1	1	x	x	sync loss			4	281.696	Yes	No	No			No	No	Yes	Yes
A5	1	1	1	0.5	x	sync loss			4	243.645	No	Yes	No			No	No	No	No
A6	discard								2							No	No	No	No
A7	1	1	1	0	x	sync loss			2	163.874	Yes	No	No			No	No	Yes	Yes
A8	1	1	1	0	x	sync loss			5	95.268	Yes	No	No			No	No	Yes	Yes
A9	1	1	1	0	x	sync loss			5	94.183	Yes	No	No			No	No	Yes	Yes
A10	1	1	0.5	0	x	sync loss			4	31.922	Yes	Yes	No			No	No	Yes	Yes
A11	1	0	0	0	x	sync loss			3	0	Yes	No	No			Center	Center	Center	Center																Center
MU Size	10	9	9	1	x	0
CVV 76	SOD1-YFP-H	F		Branch B					Sholl analysis (no partial)								T0=6
Sessions	1	2	3	4	5	6			Branch order	D from 1st loss	Loss?	Partial Loss	Gained?	Gained axo/term?	Fragmented axon?	Loss T0?	Loss? T+1	Loss? T+2	Loss? T+3	Loss? T+4
B1	1	1	1	1	x	0			2	177.948	Yes	No	No			Yes
B2	1	1	1	x	x	0			2	0	Yes	No	No			Center																			Center
B3	1	1	1	x	x	1			2	67.462	No	No	No			No
B4	1	1	1	1	x	0			1	97.618	Yes	No	No			Yes
B3'	0	0	0	0	x	1			2	61.912	No	No	Yes	?		No
B4'	0	0	0	1	x	1			1	80.058	No	No	Yes	?		No
MU Size	4	4	4	5	6	3
CVV 87	SOD1-YFP-H	M							Sholl analysis (no partial)
Sessions	1	2	3						Branch order	D from 1st loss	Loss?	Partial Loss	Gained?	Gained axo/term?	Fragmented axon?	Loss T0?	Loss? T+1	Loss? T+2	Loss? T+3	Loss? T+4
A1	0	0.5	sync loss						4			No	Yes	Axo		No initial loss
A2	0.5	0.5	sync loss						4			No	No
A3	1	1	sync loss						3			No	No
A4	0.5	1	sync loss						1			No	No
A5	1	1	sync loss						3			No	No
A6	x	1	sync loss						3			No	No
A7	1	1	sync loss						3			No	No
MU Size	6	7
CVV 96	SOD1-YFP-H	M		Branch A					Sholl analysis (no partial)
Sessions	1	2	3	4	5						Loss?	Partial Loss	Gained?	Gained axo/term?	Fragmented axon?	Loss T0?	Loss? T+1	Loss? T+2	Loss? T+3	Loss? T+4
A1	1	1	1	1	sync loss				5		No	No	No			No initial loss
A2	0.5	1	1	1	sync loss				5		No	No	No
A3	1	1	1	1	sync loss				5		No	No	No
A4	0.5	1	1	0.5	sync loss				5		No	Yes	No
A5	1	1	1	1	sync loss				5		No	No	No
A6	0.5	1	1	1	sync loss				5		No	No	No
A7	1	0.5	0.5	1	sync loss				4		No	Yes	No
A8	1	1	1	1	sync loss				2		No	No	No
A9	0.5	1	1	1	sync loss				1		No	No	No
A9'	0	0	0.5	0.5	sync loss				1		No	No	Yes	Axo
MU Size	9	9	10	10	0
CVV105	SOD1-YFP-H	M		Branch A					Sholl analysis (no partial)
Sessions	1	2	3	4	5	6			Branch order	D from 1st loss	Loss?	Partial Loss	Gained?	Gained axo/term?	Fragmented axon?	Loss T0?	Loss? T+1	Loss? T+2	Loss? T+3	Loss? T+4
A1	0.5	0.5	0.5	0.5	0.5	sync loss			8		No	No	No				No initial loss
A2	1	1	1	1	1	sync loss			8		No	No	No
A3	0.5	0.5	0.5	0.5	0.5	sync loss			8		No	No	No
A4	1	1	0.5	0.5	0.5	sync loss			8		No	Yes	No
A5	1	1	1	1	1	sync loss			7		No	No	No
A6	1	1	1	1	0.5	sync loss			7		No	Yes	No
A7	1	1	1	x	1	sync loss			6		No	No	No
A8	1	1	1	1	1	sync loss			6		No	No	No
A9	0.5	1	1	1	1	sync loss			6		No	No	No
A10	1	1	1	1	1	sync loss			4		No	No	No
A11	1	1	1	1	1	sync loss			4		No	No	No
A12	1	1	1	1	1	sync loss			4		No	No	No
A13	1	1	1	1	1	sync loss			2		No	No	No
A14	1	1	1	1	1	sync loss			5		No	No	No
A15	1	1	1	1	1	sync loss			6		No	No	No
A16	1	1	1	1	1	sync loss			6		No	No	No
A17	1	1	1	1	1	sync loss			5		No	No	No
A18	1	1	1	1	1	sync loss			4		No	No	No
A19	1	1	1	x	1	sync loss			4		No	No	No
A20	1	1	1	1	1	sync loss			3		No	No	No
A21	discard
A22	1	1	1	1	1	sync loss			3		No	No	No
MU Size	21	21	21	21	21	0
CVV107	SOD1-YFP-H	M		Branch A					Sholl analysis (no partial)
Sessions	1	2	3	4	5	6			Branch order	D from 1st loss	Loss?	Partial Loss	Gained?	Gained axo/term?	Fragmented axon?		Loss? T+1	Loss? T+2	Loss? T+3	Loss? T+4
A1	1	1	1	1	1	1			5		No	No	No				No initial loss
A2	1	1	1	1	1	1			5		No	No	No
A3	1	1	x	x	x	0.5			2		No	Yes	No
A4	1	1	1	1	1	1			5		No	No	No
A5	1	1	1	1	1	1			5		No	No	No
A6	1	1	1	1	1	1			2		No	No	No
A7	1	1	1	1	1	1			2		No	No	No
MU Size	7	7	7	7	7	7
CVV113	SOD1-YFP-H	M		Branch A					Sholl analysis (no partial)
Sessions	1	2	3	4	5	6			Branch order	D from 1st loss	Loss?	Partial Loss	Gained?	Gained axo/term?	Fragmented axon?	Loss T0?	Loss? T+1	Loss? T+2	Loss? T+3	Loss? T+4
A1	1	1	1	1	1				4		No	No	No				No initial loss
A2	1	0.5	0.5	0.5	0.5				4		No	Yes	No
A3	1	1	1	1	1				3		No	No	No
A4	0.5	0.5	0.5	0.5	0.5				3		No	No	No
A4'	0	0	0.5	0.5	0.5				3		No	No	Yes	Axo
A5	1	1	1	1	1				2		No	No	No
A6	1	1	1	1	1				1		No	No	No
A6'	0	0.5	1	1	1				1		No	No	Yes	Axo
A6''	0	0	0.5	0.5	0.5				1		No	No	Yes	Axo
A6'''	0	x	0.5	0.5	0.5				1		No	No	Yes	Axo
MU Size	6	8	10	10	10
CVV152	SOD1-YFP-H	M		Branch A					Sholl analysis (no partial)
Sessions	1	2	3	4	5	6			Branch order	D from 1st loss		Partial Loss	Gained?	Gained axo/term?	Fragmented axon?	Loss T0?	Loss? T+1	Loss? T+2	Loss? T+3	Loss? T+4
A1	1	1	1	1	0	0			5	45.21	Yes	No	No			Yes	Yes
A2	1	1	1	0.5	0	0			5		Yes	Yes	No		Frag	Center	Center
A3	1	1	1	1	0.5	0			4	43.1	Yes	Yes	No		Frag	No	Yes
A4	1	1	1	0.5	0	0			4		Yes	Yes	No		Frag	Center	Center
A5	1	1	1	1	1	0			4	74.47	Yes	No	No		Frag	No	Yes
A6	0.5	0.5	0.5	0.5	0.5	0.5			2	104.127	No	No	No			No	No
A6'	0	0	0	x	1	1			2	146.41	No	No	Yes	Axo		No	No
A7	1	0.5	0.5	1	0.5	0.5			1	181.595	No	Yes	No			No	No
MU Size	7	7	7	8	5	3
													Loss NMJs
														T0	T1	T2	T3	T4
													Total	3	9	17	24	26
													0-49	1	3	4	4	4
													50-99	1	2	4	4	5
													100-149	0	1	1	2	2
													150-199	1	2	3	3	3
													200-249	0	0	0	2	2
													250-299	0	1	5	6	6
													300-349	0	0	0	0	0
													350-399	0	0	0	1	2
													400+	0	0	0	2	2
													Ctrl - SUM	3	9	17	24	26
													Total number of NMJs
														T0	T1	T2	T3	T4
													0-49	12	12	12	12	12
													50-99	20	20	20	20	20
													100-149	20	20	20	20	20
													150-199	18	18	18	18	18
													200-249	17	17	17	17	17
													250-299	21	21	21	21	21
													300-349	1	1	1	1	1
													350-399	6	6	6	6	6
							Losses						400+	15	15	15	15	15
							Total # of Loss NMJs	Total # of partially lost NMJs	Fragmented axons					130	130	130	130	130
							38	29	9
							Expansion						Cumulative % of loss NMJs as function of distance
							Axo	Terminal	Both					T0	T1	T2	T3	T4
							65	3	1				Total	3	8	16	21	22
													0-99	0.0625	0.15625	0.25	0.25	0.28125
													100-199	0.0263158	0.0789474	0.105263	0.131579	0.131579
													200-299	0	0.0263158	0.131579	0.210526	0.210526
													300-399	0	0	0	0.142857	0.285714
													400+	0	0	0	0.133333	0.133333
