# Supplementary figures and images for: Dynamic neuromuscular remodeling precedes motor-unit loss in a mouse model of ALS
Source: eLife journal article supplement (doi:10.7554/elife.41973), 2018-10-15

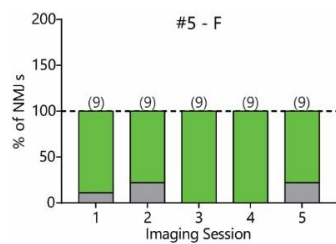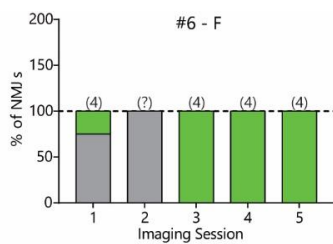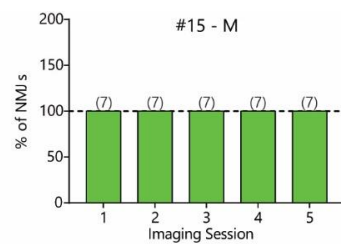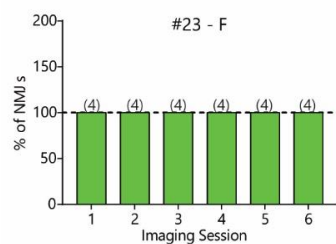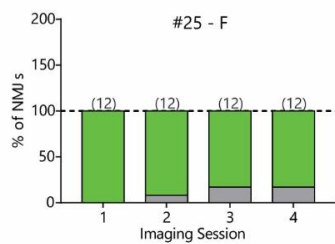

■ Fully inn. by MU  
■ Not observable NMJs  
 (x) # of NMJs inn. by MU

Supplement: supp [file elife-41973-supp-v1.zip]

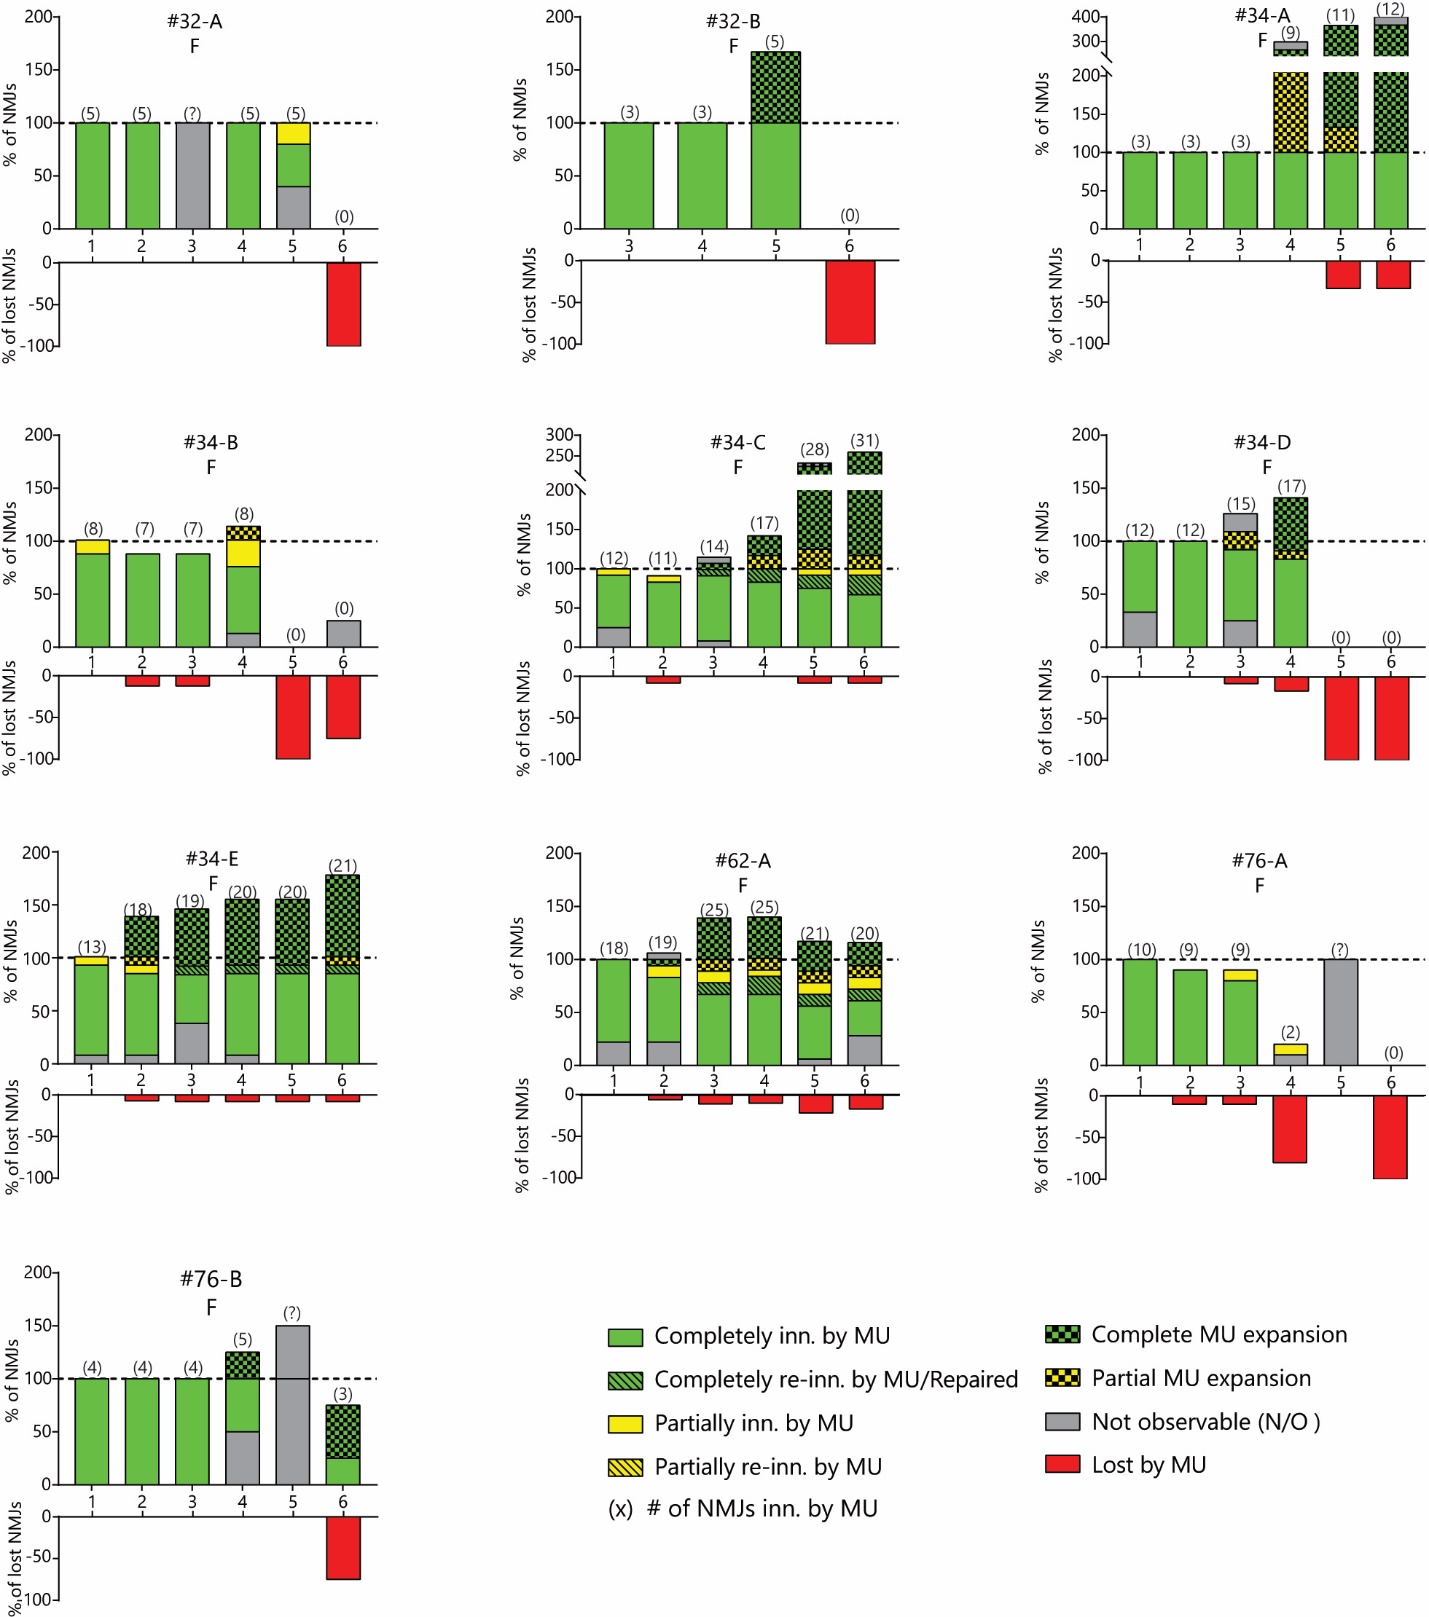


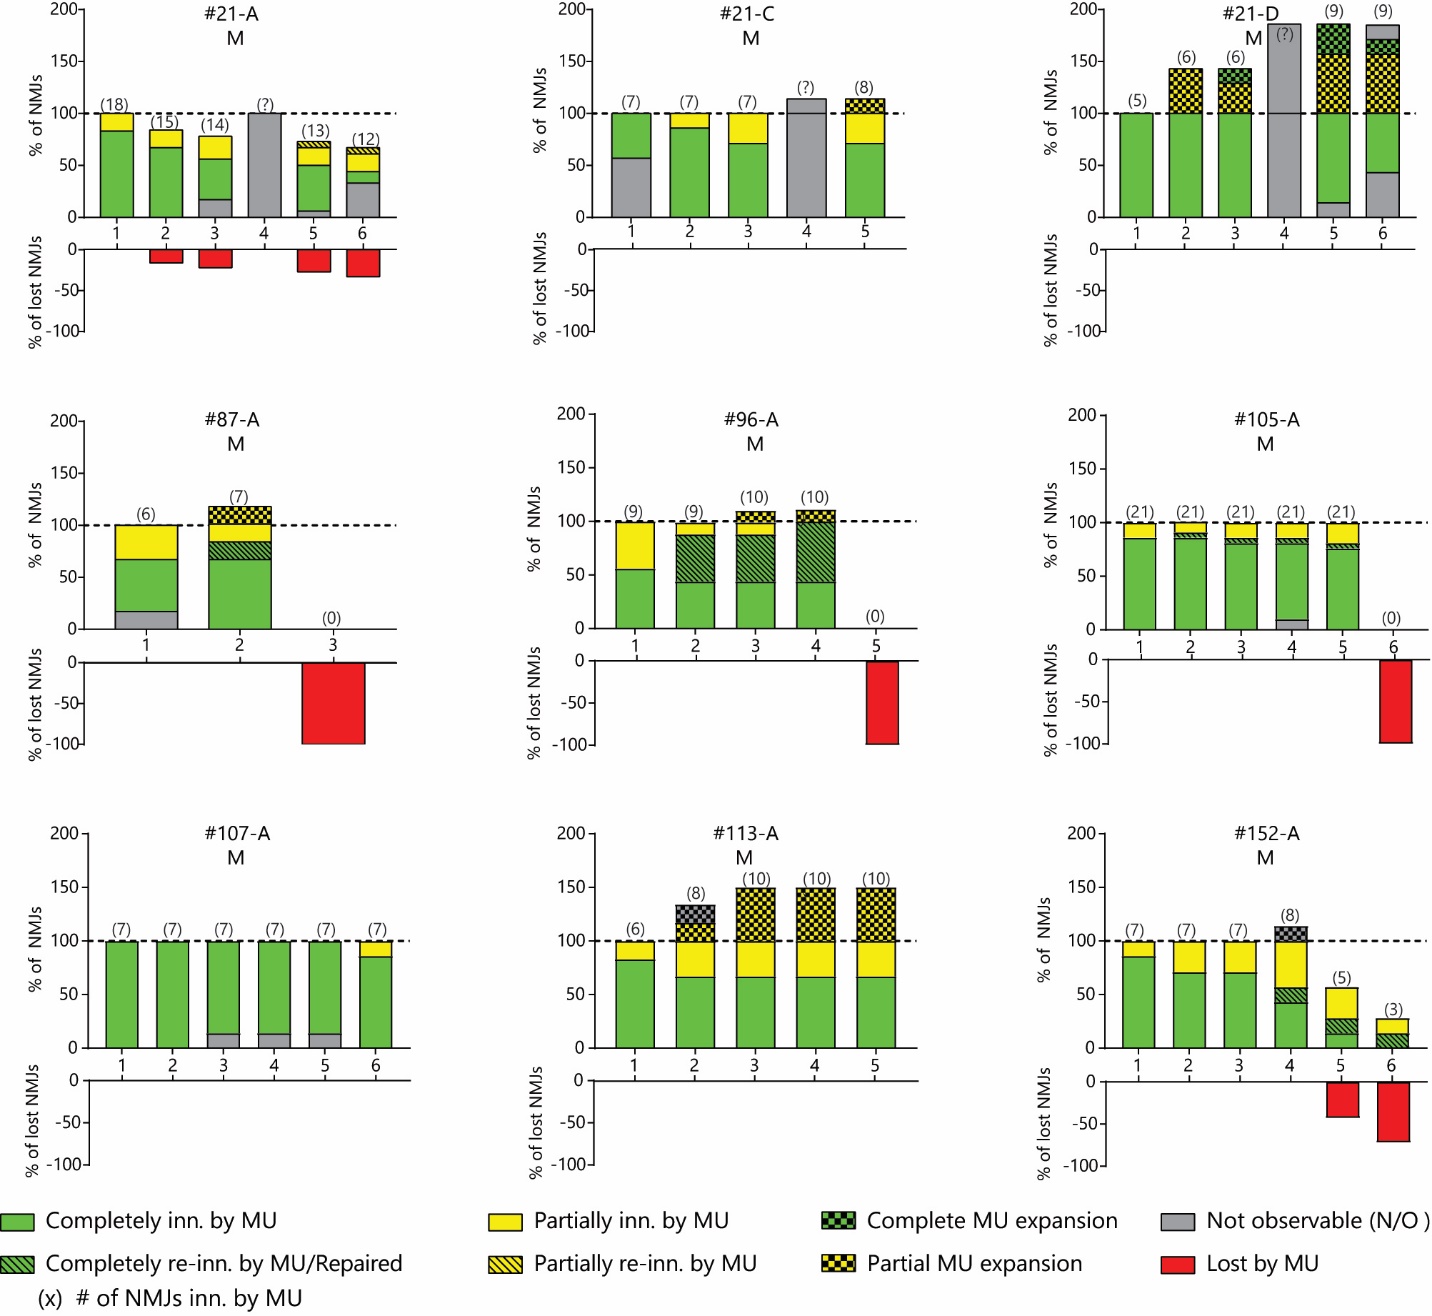

Supplement: supp [file Figure 4_indivGraphs.docx]
